# Supplementary material for: Impact of monovalent rotavirus vaccine on diarrhoea-associated post-neonatal infant mortality in rural communities in Malawi: a population-based birth cohort study
Source: PubMed Central journal article supplement (PMC6088152; doi:10.1016/s2214-109x(18)30314-0), 2018-08-10
Supplement: mmc1.pdf [file mmc1.pdf]

# THE LANCET

## Global Health

### Supplementary appendix

This appendix formed part of the original submission and has been peer reviewed. We post it as supplied by the authors.

Supplement to: Bar-Zeev N, King C, Phiri T, et al. Impact of monovalent rotavirus vaccine on diarrhoea-associated post-neonatal infant mortality in rural communities in Malawi: a population-based birth cohort study. *Lancet Glob Health* 2018; **6**: e1036–44.

## **Appendix Materials**

### **Appendix 1: Additional figures**

**Appendix Figure 1: Map of Malawi, study sites marked in red**

**Appendix Figure 2: Site 1 pre-vaccination cohort flow diagram per STROBE guidelines**

**Appendix Figure 3: Poisson model predicted diarrhoea-associated mortality vs vaccine coverage,  
Site 1**

**Appendix 2: Sensitivity analysis using different survival cut-offs and investigating random effects**

**Appendix 3: Socio-demographic status, Site 1**

**Appendix 4: Vaccine status construction**

**Appendix 5: Smoothing of mortality over time in Figure 2**

**Appendix 1: Additional figures**

**Appendix Figure 1: Map of Malawi, study sites marked in red**

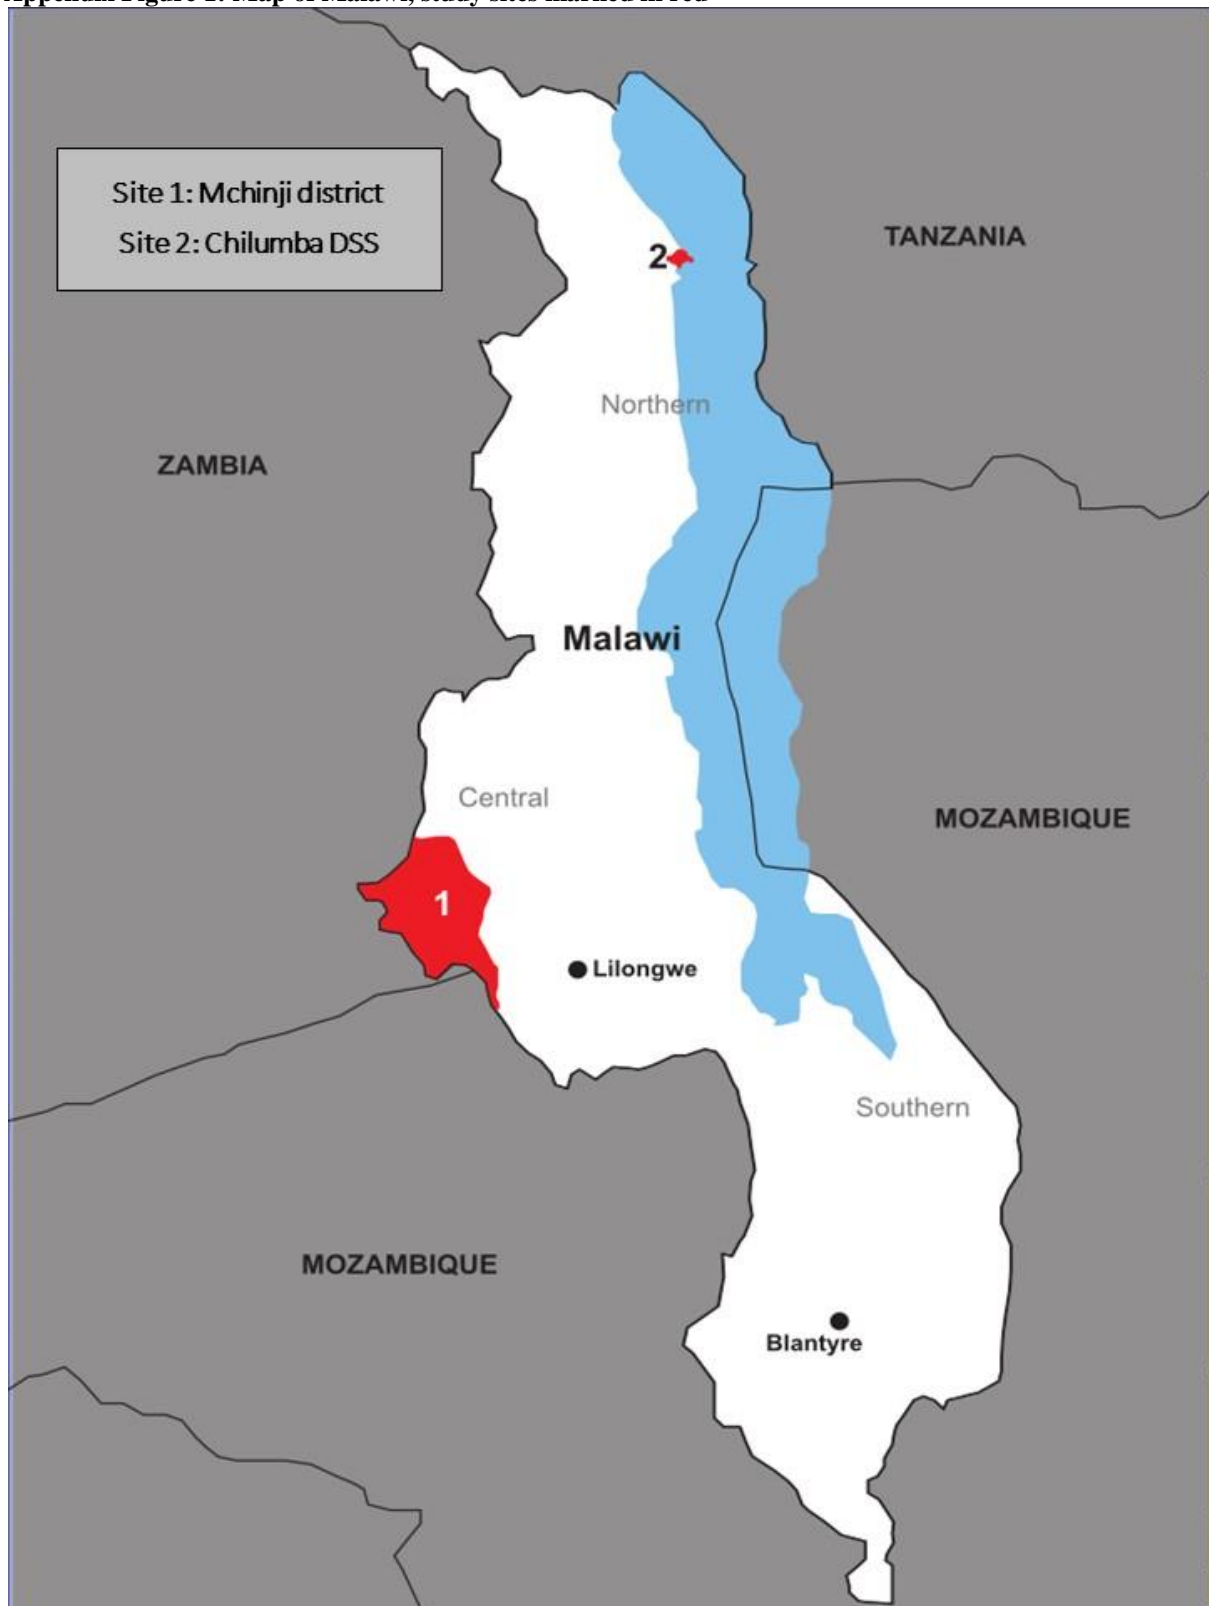

**Appendix Figure 2: Site 1 pre-vaccination cohort flow diagram per STROBE guidelines**

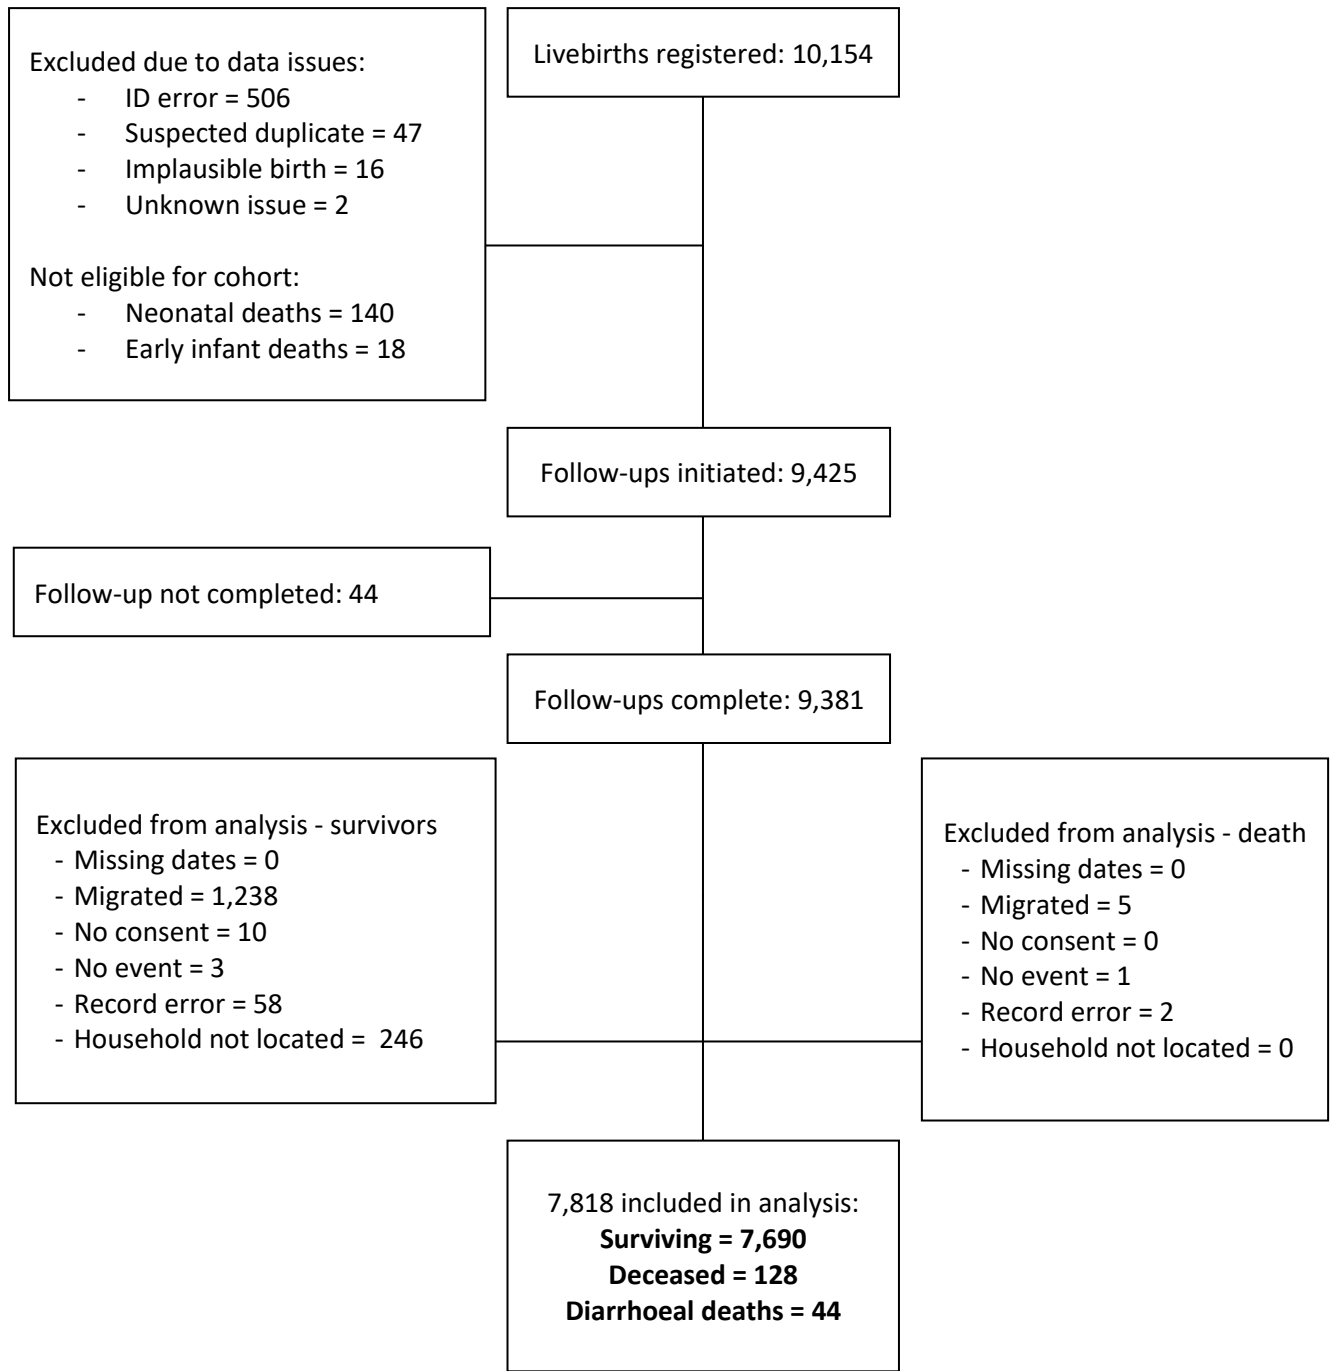

Appendix Figure 3: Poisson model predicted diarrhoea-associated mortality vs vaccine coverage, Site 1.

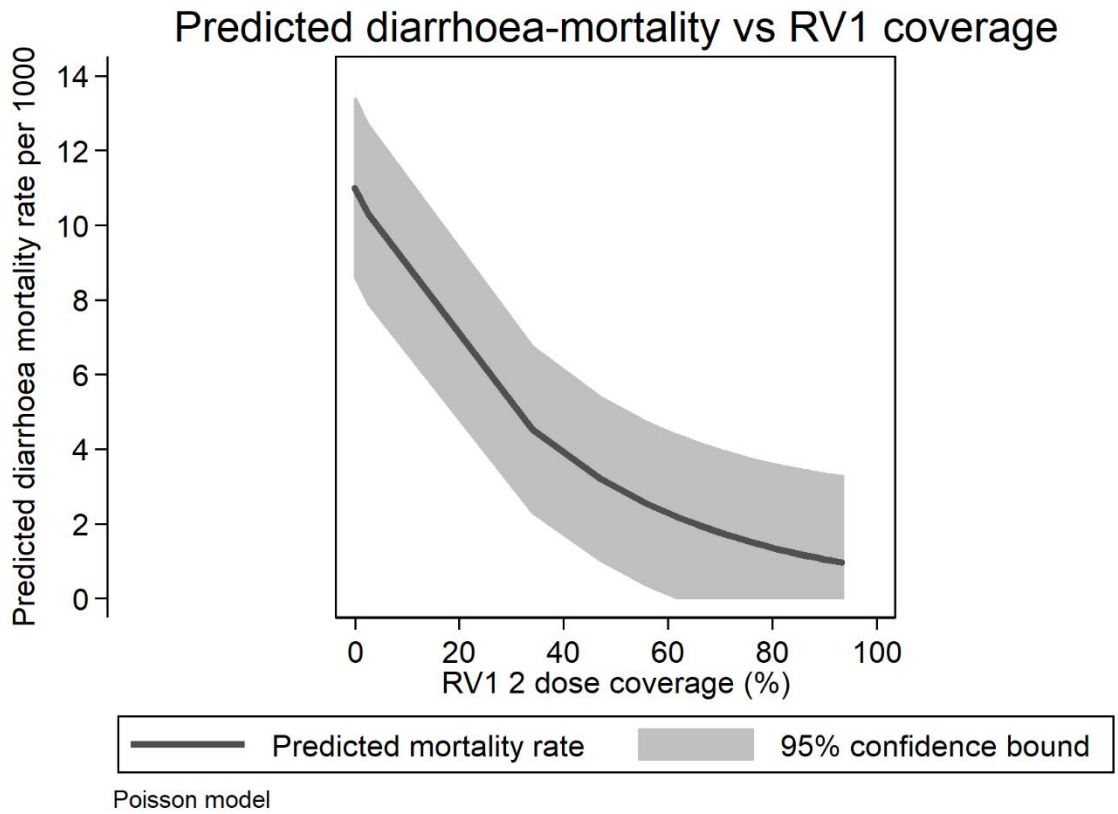

## Appendix 2: Sensitivity survival analyses, Site 1

### 2.1 InterVA defined diarrhoea outcome (10wk survival)

|                       | Variable           | Hazard Ratio | 95% Confidence Interval |        | p-value |
|-----------------------|--------------------|--------------|-------------------------|--------|---------|
| RV status             | 0 doses            | 1.00         |                         |        |         |
|                       | 2 doses            | 0.71         | 0.21                    | 2.35   | 0.574   |
| Mother's status       | Married            | 1.00         |                         |        |         |
|                       | Single             | 2.34         | 0.79                    | 6.93   | 0.126   |
|                       | Divorced/widow     | 1.85         | 0.54                    | 6.34   | 0.330   |
|                       | Deceased           | 66.60        | 8.93                    | 469.80 | <0.001  |
| Mother's education    | None               | 1.00         |                         |        |         |
|                       | Primary            | 0.57         | 0.23                    | 1.42   | 0.230   |
|                       | Secondary/Tertiary | 0.44         | 0.10                    | 1.89   | 0.271   |
| Water source          | Protected source   | 1.00         |                         |        |         |
|                       | Open source        | 1.03         | 0.42                    | 2.53   | 0.942   |
| Toilet facility       | None               | 1.00         |                         |        |         |
|                       | Some facility      | 0.94         | 0.40                    | 2.24   | 0.890   |
| House quality         | Worst              | 1.00         |                         |        |         |
|                       | Middle             | 0.88         | 0.26                    | 3.00   | 0.842   |
|                       | Best               | 2.62         | 0.83                    | 8.29   | 0.101   |
| Household asset index |                    | 0.69         | 0.48                    | 0.99   | 0.041   |

Global test of proportional hazards: 0.2942

Infants eligible for inclusion in this sensitivity analysis: 27,912 survived, 31 died

## 2.2 Cohort inclusion at 6 week survival

|                       | Variable           | Hazard Ratio | 95% Confidence Interval |        | p-value |
|-----------------------|--------------------|--------------|-------------------------|--------|---------|
| RV status             | 0 doses            | 1.00         |                         |        |         |
|                       | 2 doses            | 0.57         | 0.31                    | 1.04   | 0.066   |
| Mother's status       | Married            | 1.00         |                         |        |         |
|                       | Single             | 1.85         | 0.97                    | 3.52   | 0.061   |
|                       | Divorced/widow     | 1.45         | 0.69                    | 3.06   | 0.323   |
|                       | Deceased           | 82.90        | 33.40                   | 205.77 | <0.001  |
| Mother's education    | None               | 1.00         |                         |        |         |
|                       | Primary            | 1.00         | 0.55                    | 1.80   | 0.990   |
|                       | Secondary/Tertiary | 0.85         | 0.37                    | 1.96   | 0.700   |
| Water source          | Protected source   | 1.00         |                         |        |         |
|                       | Open source        | 1.42         | 0.91                    | 2.22   | 0.122   |
| Toilet facility       | None               | 1.00         |                         |        |         |
|                       | Some facility      | 1.29         | 0.77                    | 2.17   | 0.333   |
| House quality         | Worst              | 1.00         |                         |        |         |
|                       | Middle             | 0.93         | 0.50                    | 1.72   | 0.818   |
|                       | Best               | 1.65         | 0.82                    | 3.33   | 0.161   |
| Household asset index |                    | 0.73         | 0.61                    | 0.88   | 0.001   |

Global test of proportional hazards: 0.447

Infants eligible for inclusion in this sensitivity analysis: Survived = 28,342, died = 105

### 2.3 Cohort inclusion at 26 week survival

| Variable              |                    | Hazard Ratio | 95% Confidence Interval |        | p-value |
|-----------------------|--------------------|--------------|-------------------------|--------|---------|
| RV status             | 0 doses            | 1.00         |                         |        |         |
|                       | 2 doses            | 0.72         | 0.33                    | 1.58   | 0.412   |
| Mother's status       | Married            | 1.00         |                         |        |         |
|                       | Single             | 1.69         | 0.76                    | 3.76   | 0.199   |
|                       | Divorced/widow     | 1.92         | 0.86                    | 4.31   | 0.111   |
|                       | Deceased           | 136.81       | 54.62                   | 342.69 | <0.001  |
| Mother's education    | None               | 1.00         |                         |        |         |
|                       | Primary            | 1.17         | 0.56                    | 2.47   | 0.675   |
|                       | Secondary/Tertiary | 1.08         | 0.40                    | 2.89   | 0.881   |
| Water source          | Protected source   | 1.00         |                         |        |         |
|                       | Open source        | 1.42         | 0.84                    | 2.39   | 0.188   |
| Toilet facility       | None               | 1.00         |                         |        |         |
|                       | Some facility      | 1.25         | 0.68                    | 2.30   | 0.471   |
| House quality         | Worst              | 1.00         |                         |        |         |
|                       | Middle             | 0.93         | 0.46                    | 1.91   | 0.853   |
|                       | Best               | 1.44         | 0.63                    | 3.34   | 0.389   |
| Household asset index |                    | 0.77         | 0.62                    | 0.96   | 0.020   |

Global test of proportional hazards: 0.665

Infants eligible for inclusion in this sensitivity analysis: Survived = 27,718, died = 77



#### 2.4 Any dose of RV versus 0 doses (10 week cohort inclusion)

|                       | Variable           | Hazard Ratio | 95% Confidence Interval |        | p-value |
|-----------------------|--------------------|--------------|-------------------------|--------|---------|
| RV status             | 0 doses            | 1.00         |                         |        |         |
|                       | ≥1 dose            | 0.62         | 0.32                    | 1.20   | 0.156   |
| Mother's status       | Married            | 1.00         |                         |        |         |
|                       | Single             | 1.87         | 0.95                    | 3.68   | 0.071   |
|                       | Divorced/widow     | 1.42         | 0.65                    | 3.14   | 0.382   |
|                       | Deceased           | 94.73        | 37.47                   | 239.49 | <0.001  |
| Mother's education    | None               | 1.00         |                         |        |         |
|                       | Primary            | 1.43         | 0.70                    | 2.89   | 0.324   |
|                       | Secondary/Tertiary | 1.48         | 0.60                    | 3.66   | 0.393   |
| Water source          | Protected source   | 1.00         |                         |        |         |
|                       | Open source        | 1.56         | 0.99                    | 2.44   | 0.053   |
| Toilet facility       | None               | 1.00         |                         |        |         |
|                       | Some facility      | 1.24         | 0.73                    | 2.12   | 0.422   |
| House quality         | Worst              | 1.00         |                         |        |         |
|                       | Middle             | 0.90         | 0.47                    | 1.71   | 0.740   |
|                       | Best               | 1.65         | 0.83                    | 3.28   | 0.151   |
| Household asset index |                    | 0.77         | 0.63                    | 0.93   | 0.006   |

Global test of proportional hazards: 0.779

Infants eligible for inclusion in this sensitivity analysis: Survived = 28,012, died = 101

## 2.5 All-cause non-traumatic mortality (10 week cohort inclusion)

| Variable              |                    | Hazard Ratio | 95% Confidence Interval |       | p-value |
|-----------------------|--------------------|--------------|-------------------------|-------|---------|
| RV status             | 0 doses            | 1.00         |                         |       |         |
|                       | 2 doses            | 0.29         | 0.22                    | 0.38  | <0.001  |
| Mother's status       | Married            | 1.00         |                         |       |         |
|                       | Single             | 2.27         | 1.59                    | 3.23  | <0.001  |
|                       | Divorced/widow     | 1.97         | 1.33                    | 2.92  | 0.001   |
|                       | Deceased           | 49.13        | 24.25                   | 99.56 | <0.001  |
| Mother's education    | None               | 1.00         |                         |       |         |
|                       | Primary            | 1.02         | 0.73                    | 1.45  | 0.89    |
|                       | Secondary/Tertiary | 0.75         | 0.45                    | 1.24  | 0.26    |
| Water source          | Protected source   | 1.00         |                         |       |         |
|                       | Open source        | 1.27         | 0.98                    | 1.65  | 0.07    |
| Toilet facility       | None               | 1.00         |                         |       |         |
|                       | Some facility      | 1.27         | 0.95                    | 1.71  | 0.11    |
| House quality         | Worst              | 1.00         |                         |       |         |
|                       | Middle             | 0.79         | 0.54                    | 1.14  | 0.21    |
|                       | Best               | 1.15         | 0.74                    | 1.79  | 0.53    |
| Household asset index |                    | 0.83         | 0.74                    | 0.92  | 0.001   |

Global test of proportional hazards: 0.0002 (ie PH assumption is rejected)

Infants eligible for inclusion in this sensitivity analysis: Survived = 27,912, died = 317

### Appendix 3: Socio-demographic status, Site 1.

#### 3.1 Socio-demographic characteristics of children according to vaccination status

| Variable         |                  | 0 doses          |        | 1 dose           |        | 2 doses          |        |
|------------------|------------------|------------------|--------|------------------|--------|------------------|--------|
|                  |                  | N                | (%)    | N                | (%)    | N                | (%)    |
| <b>TOTAL</b>     |                  | 1,750            |        | 603              |        | 25,831           |        |
| Mother died      |                  | 3                | (0.2%) | 0                | (0%)   | 22               | (0.1%) |
| Marital status:  | Married          | 1,536            | (88%)  | 541              | (90%)  | 23,273           | (90%)  |
|                  | Single           | 95               | (5%)   | 33               | (5%)   | 1,406            | (5%)   |
|                  | Divorced/widow   | 114              | (7%)   | 28               | (5%)   | 1,133            | (5%)   |
| Education:       | None             | 260              | (15%)  | 103              | (17%)  | 2,762            | (11%)  |
|                  | Primary          | 1,341            | (77%)  | 447              | (74%)  | 19,771           | (77%)  |
|                  | Secondary        | 148              | (8%)   | 52               | (9%)   | 3,285            | (13%)  |
| Water source     | Open source      | 444              | (25%)  | 129              | (21%)  | 4,523            | (18%)  |
|                  | Protected source | 1,304            | (75%)  | 474              | (79%)  | 21,308           | (82%)  |
| Toilet facility  | No facility      | 394              | (23%)  | 139              | (23%)  | 4,561            | (18%)  |
|                  | Some facility    | 1,354            | (77%)  | 464              | (77%)  | 21,268           | (82%)  |
| House quality    | Worst            | 1,399            | (80%)  | 471              | (78%)  | 19,675           | (76%)  |
|                  | Middle           | 234              | (13%)  | 80               | (13%)  | 3,906            | (15%)  |
|                  | Best             | 115              | (7%)   | 52               | (9%)   | 2,247            | (9%)   |
|                  |                  | <b>Mean (SD)</b> |        | <b>Mean (SD)</b> |        | <b>Mean (SD)</b> |        |
| Mother's age     |                  | 27.6             | (6.76) | 27.7             | (7.30) | 27.0             | (6.58) |
| Household assets |                  | 1.33             | (1.15) | 1.36             | (1.15) | 1.55             | (1.18) |

### 3.2 Socio-demographic characteristics of entire cohort over time

| Socio-demographic factor                | Year  |       |       |       |
|-----------------------------------------|-------|-------|-------|-------|
|                                         | 2012  | 2013  | 2014  | 2015  |
| Any toilet facility                     | 78.4% | 79.9% | 83.4% | 85.1% |
| Household mobile phone ownership        | 38.5% | 42.0% | 44.6% | 50.1% |
| No maternal education                   | 13.6% | 11.8% | 10.4% | 9.4%  |
| Maternal primary education              | 74.2% | 75.7% | 77.3% | 78.5% |
| Maternal secondary / tertiary education | 11.8% | 12.3% | 12.3% | 12.1% |

## Appendix 4: Vaccine status construction

There are three sources of vaccine status information available in Malawi:

- Health passports (government issued caregiver-held documents)
- Caregiver recall
- Under 1 government vaccine registers (filled by healthcare workers at the point of vaccination and stored in frontline health facilities)

Health passports were witnessed at home-visit interviews at 4 months and 1 year of age and at verbal autopsy interviews. Degree of reliability was then assigned to vaccine data source as outlined in the table, including relative merits of each source.

### 4.1 Vaccine data source reliability

| Data Source                         | Strengths                                                                                                                                                 | Weaknesses                                                                                                                                                                                                                                            | Reliability |
|-------------------------------------|-----------------------------------------------------------------------------------------------------------------------------------------------------------|-------------------------------------------------------------------------------------------------------------------------------------------------------------------------------------------------------------------------------------------------------|-------------|
| Health passport                     | <ul style="list-style-type: none"> <li>• Filled in at the point of vaccination</li> <li>• Dates included</li> <li>• Less than 5% mis-recording</li> </ul> | <ul style="list-style-type: none"> <li>• Differential availability according to survival status</li> </ul>                                                                                                                                            | High        |
| Under 1 register                    | <ul style="list-style-type: none"> <li>• Routine data, therefore should be available for all, irrespective of survival status</li> </ul>                  | <ul style="list-style-type: none"> <li>• Some registers are missing or of very poor quality</li> <li>• Issues in tracing children through registers and across facilities</li> <li>• Absence of record does not mean they are unvaccinated</li> </ul> | Medium      |
| Caregiver recall with known dates   | <ul style="list-style-type: none"> <li>• Dates included</li> <li>• Generally some documented evidence provided e.g. twins health passport</li> </ul>      | <ul style="list-style-type: none"> <li>• Uncommon</li> </ul>                                                                                                                                                                                          | High        |
| Caregiver recall of no vaccinations | <ul style="list-style-type: none"> <li>• Generally anecdotal support which makes it believable</li> </ul>                                                 | <ul style="list-style-type: none"> <li>• Uncommon</li> <li>• Relies on accurate recall</li> </ul>                                                                                                                                                     | High        |
| Caregiver recall                    | <ul style="list-style-type: none"> <li>• Available for most children, regardless of survival status</li> </ul>                                            | <ul style="list-style-type: none"> <li>• Recall bias and social-desirability bias (in both directions), so hard to adjust for the uncertainty</li> <li>• Chance of interviewer bias</li> </ul>                                                        | Low         |

The following hierarchical rules were applied to construct a binary variable indicating vaccine received or vaccine not received:

1. If at home visit interview or VA a vaccine is recorded as ‘received’ in the health passport, this information will be taken as correct.
2. If at home visit interview or VA a vaccine is recorded as ‘not received’ or ‘missing’, or where no health passport was seen:
  - a. If available, the vaccine status from a health passport at any prior 4-month interview (if such occurred) will be used
  - b. If vaccines have been recorded in the under 1 register with evidence of a date of vaccination, this vaccine status will be used
  - c. If vaccine status is not determined by 1, 2a or 2b then caregiver report will be used.
3. In case of data conflict between 4-month visit, 1 year old visit, under-1 register or maternal report, information from the health passport will be prioritised, followed by under 1 register and then caregiver report.

## Appendix 5: Smoothing of mortality over time in Figure 2

Figure 2 Panel A. shows locally weighted scatterplot smoothing function of all-cause and diarrhoea-associated mortality in 10-51 week old infants from Site 1 as implemented by Stata 13.1 on basis of Cleveland, W. S. 1979. Robust locally weighted regression and smoothing scatterplots. Journal of the American Statistical Association 74: 829-836.

Figure 2 Panel B. shows the 12-month locally weighted moving average smoothing function of all-cause and diarrhoea-associated mortality in 10-51 week old infants from Site 2. The longer duration of data prior to vaccine introduction allowed us to use 12-month weighting to demonstrate the trend over years. The function was defined as follows:

$$\hat{Y}_t = \frac{1}{24}(Y_{t-6} + Y_{t+6}) + \frac{1}{12}(Y_t + Y_{t-1} + Y_{t+1} + Y_{t-2} + Y_{t+2} + Y_{t-3} + Y_{t+3} + Y_{t-4} + Y_{t+4} + Y_{t-5} + Y_{t+5})$$

; where  $Y_t$  is the monthly observation at month t and  $\hat{Y}_t$  is the locally-weighted estimate at month t.
